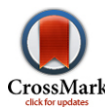

# Relationship between Lifestyle and Health Factors and Severe Lower Urinary Tract Symptoms (LUTS) in 106,435 Middle-Aged and Older Australian Men: Population-Based Study

David P. Smith<sup>1,2\*</sup>, Marianne F. Weber<sup>2,3</sup>, Kay Soga<sup>4</sup>, Rosemary J. Korda<sup>4</sup>, Gabriella Tikellis<sup>5</sup>, Manish I. Patel<sup>3</sup>, Mark S. Clements<sup>6</sup>, Terry Dwyer<sup>5</sup>, Isabel K. Latz<sup>7</sup>, Emily Banks<sup>8,4</sup>

**1** Cancer Research Division, Cancer Council NSW, Sydney, New South Wales, Australia, **2** Griffith Health Institute, Griffith University, Gold Coast, Queensland, Australia, **3** School of Public Health, Sydney University, Sydney, New South Wales, Australia, **4** National Centre for Epidemiology and Population Health, Australian National University, Canberra, Australian Capital Territory, Australia, **5** Murdoch Childrens Research Institute, Melbourne, Victoria, Australia, **6** Karolinska Institute, Stockholm, Sweden, **7** Fielding School of Public Health, University of California Los Angeles, Los Angeles, California, United States of America, **8** The Sax Institute, Sydney, New South Wales, Australia

## Abstract

**Background:** Despite growing interest in prevention of lower urinary tract symptoms (LUTS) through better understanding of modifiable risk factors, large-scale population-based evidence is limited.

**Objective:** To describe risk factors associated with severe LUTS in the 45 and Up Study, a large cohort study.

**Design, Setting, and Participants:** A cross-sectional analysis of questionnaire data from 106,435 men aged  $\geq 45$  years, living in New South Wales, Australia.

**Outcome Measures and Statistical Analysis:** LUTS were measured by a modified version of the International Prostate Symptom Score (m-IPSS). The strength of association between severe LUTS and socio-demographic, lifestyle and health-related factors was estimated, using logistic regression to calculate odds ratios, adjusted for a range of confounding factors.

**Results:** Overall, 18.3% reported moderate, and 3.6% severe, LUTS. Severe LUTS were more common among men reporting previous prostate cancer (7.6%), total prostatectomy (4.9%) or having part of the prostate removed (8.2%). After excluding men with prostate cancer or prostate surgery, the prevalence of moderate-severe LUTS in the cohort ( $n = 95,089$ ) ranged from 10.6% to 35.4% for ages 45–49 to  $\geq 80$ ; the age-related increase was steeper for storage than voiding symptoms. The adjusted odds of severe LUTS decreased with increasing education (tertiary qualification versus no school certificate, odds ratio (OR) = 0.78 (0.68–0.89)) and increasing physical activity (high versus low, OR = 0.83 (0.76–0.91)). Odds were elevated among current smokers versus never-smokers (OR = 1.64 (1.43–1.88)), obese versus healthy-weight men (OR = 1.27 (1.14–1.41)) and for comorbid conditions (e.g., heart disease versus no heart disease, OR = 1.36 (1.24–1.49)), and particularly for severe versus no physical functional limitation (OR = 5.17 (4.51–5.93)).

**Conclusions:** LUTS was associated with a number of factors, including modifiable risk factors, suggesting potential targets for prevention.

**Citation:** Smith DP, Weber MF, Soga K, Korda RJ, Tikellis G, et al. (2014) Relationship between Lifestyle and Health Factors and Severe Lower Urinary Tract Symptoms (LUTS) in 106,435 Middle-Aged and Older Australian Men: Population-Based Study. PLoS ONE 9(10): e109278. doi:10.1371/journal.pone.0109278

**Editor:** Utpal Sen, University of Louisville, United States of America

**Received:** June 17, 2014; **Accepted:** August 29, 2014; **Published:** October 15, 2014

**Copyright:** © 2014 Smith et al. This is an open-access article distributed under the terms of the Creative Commons Attribution License, which permits unrestricted use, distribution, and reproduction in any medium, provided the original author and source are credited.

**Data Availability:** The authors confirm that, for approved reasons, some access restrictions apply to the data underlying the findings. We obtained the data for the project from a third party, namely the Sax Institute, which is the data custodian for the 45 and Up Study. Data are available through application to the Sax Institute. Details are available at <https://www.saxinstitute.org.au/our-work/45-up-study/> or through contacting [45andUp.research@saxinstitute.org.au](mailto:45andUp.research@saxinstitute.org.au).

**Funding:** DPS (APP1016598) and EB (APP1042717) are supported by the National Health and Medical Research Council of Australia, <https://www.nhmrc.gov.au/>. This project was supported in part by a JM O'Hara Grant from the Pharmaceutical Society of Western Australia, <http://www.pswa.org.au/>, and by a National Health and Medical Research Council of Australia project grant (APP1024450). The funders had no role in study design, data collection and analysis, decision to publish, or preparation of the manuscript.

**Competing Interests:** The authors have declared that no competing interests exist.

\* Email: [dsmith@nswcc.org.au](mailto:dsmith@nswcc.org.au)

## Introduction

Lower urinary tract symptoms (LUTS) represent a cluster of chronic urinary problems, generally arising as the result of

disorders of the bladder, bladder neck, prostate or urethra; with LUTS most commonly attributed to benign prostatic hyperplasia (BPH). LUTS are associated with diminished quality of life [1,2]

and if left untreated, can progress to urinary retention, urinary tract infections and renal insufficiency [3].

The development and widespread acceptance of the International Prostate Symptom Score (IPSS) has increased the comparability of population based studies of LUTS in men worldwide [4]. The prevalence of moderate-severe symptoms, as measured by the IPSS, is approximately 20% among men aged over 40 years [5,6,7]. LUTS can be further classified into storage, voiding or postmicturition symptoms.

Much of the research to date has focussed on surgical or medical management of symptoms but there is growing interest in identifying preventive measures for reducing the burden of LUTS by identifying risk factors associated with these symptoms, especially those that are potentially modifiable [8]. Age is the primary risk factor for LUTS, with prevalence, number of symptoms and severity of symptoms all increasing with age [9]. Other risk factors include comorbidities such as diabetes, cardiovascular disease, hypertension and the side effects of the pharmacological treatments for these comorbidities [10]. Other postulated but not yet clearly established factors associated with LUTS include higher body mass index (BMI), lower socio-economic status, being married, family history, dietary and lifestyle factors (such as alcohol, caffeine, smoking, physical inactivity), history of sexually transmitted diseases, other prostate-related conditions and ethnicity [8,11,12,13,14].

The objective of this study was to examine the association between demographic, lifestyle and health-related factors that may be associated with severe LUTS, including storage and voiding symptoms separately, in men aged 45 years or older. This was achieved through analysis of data obtained from men participating in a large population-based Australian cohort study; the 45 and Up Study.

## Methods

### Study sample

The Sax Institute's 45 and Up Study is a population-based cohort study of people aged 45 and over in New South Wales (NSW), the most populous state of Australia [15]. The cohort was established with the aim of providing reliable evidence to inform health policy to support Australia's healthy ageing population. Participants were randomly sampled from the Medicare Australia database, Australia's universal health insurance system, which includes all citizens and permanent residents of Australia, some temporary residents and refugees. People aged 80 years and over and residents of regional areas were oversampled by a factor of two. Participants completed a mailed self-administered questionnaire and consent form for long term follow-up, distributed from 2006–2008. The participation rate was 18%; however, the 45 and Up study sample has excellent heterogeneity and is reasonably representative of the NSW population, comprising approximately 10% of the total population aged 45 and over. The 45 and Up Study, has a response rate comparable to similar contemporary studies internationally and in Australia, and has been shown to yield reliable data on risk factor – outcome relationships [16]. This paper uses the baseline cross-sectional data from the 123,751 men who entered the Study during the time period from 2006 to 2009. Men with missing data for age ( $n = 3$ ) and those with missing data on any individual component of the m-IPSS ( $n = 17,313$ ; 14.0%) were excluded leaving a sample of 106,435 men. There were more missing m-IPSS data in older age groups than younger age groups.

### Assessment of Lower Urinary Tract Symptoms (LUTS)

A modified version of the IPSS was used in the 45 and Up Study. The IPSS captures seven urinary symptoms by enquiring about men's self-reported urinary function and symptoms over the past month [4]. Three of these seven are 'storage' symptoms: difficulty postponing urination ('urgency'), having to urinate again less than 2 hours after finishing previous urination ('frequency'), having to urinate frequently during the night ('nocturia'); and four of the seven are 'voiding' symptoms: having to push or strain to start urination ('straining'), a weak urinary stream ('weak stream'), stopping and starting again several times during urination ('intermittency'), and the feeling of incomplete emptying of the bladder after urination ('incomplete emptying'). The modified IPSS (m-IPSS) had identical questions regarding symptoms to the IPSS, but had a 4-point response scale ("not at all", "sometimes", "often", "almost always") compared with a 6-point response scale used on the original IPSS. For the nocturia item, respondents were asked 'over the past month, how many times did you usually get up from bed to urinate during the night?' The respondents chose one of the two answers, 'never' and 'some nights,' and then entered a 'number of times per night\_\_\_' if applicable. The modification was made to ensure the entire baseline questionnaire would fit on five printed pages.

### Overall LUTS score

To allow comparability between the m-IPSS and the IPSS and to categorise men's symptoms as mild, moderate or severe, we calibrated the m-IPSS used in the 45 and Up Study with IPSS results from a representative Australian study of male urinary symptoms, MATeS [17]. The calibration procedure has been described previously [14]. Briefly, we compared frequency distributions for the summary scores of the original IPSS from MATeS and the m-IPSS from the 45 and Up Study for participants aged  $\geq 45$  in age-specific subgroups. Using standard cut-offs for the IPSS (0–7, 8–19, 20–35 for no/mild, moderate and severe symptoms, respectively) we ascertained the proportion of men in each of these categories both overall and within 5-year age groups. Cut-off points were set for the m-IPSS to ensure that similar proportions of men fell into each symptom category. Based on the calibration method outlined above, the cut-off values for clinical ranges of the m-IPSS were: 0–5 (no/mild symptoms), 6–11 (moderate symptoms) and 12–21 (severe symptoms). The main outcome used in the analyses was a dichotomous variable, with men classified as having severe LUTS (severe symptoms) or not (no/mild or moderate symptoms).

### Storage and voiding symptoms

To assess the presence of storage (irritative) and voiding (obstructive) symptoms, participants who answered 'not at all', 'sometimes', 'often' or 'almost always' for a particular symptom received a score of 0, 1, 2 or 3, respectively. For nocturia, individuals who reported that they urinated 0, 1, 2 or 3 times during the night received a score of 0, 1, 2 or 3, respectively. Respondents who reported that they urinated more than 3 times per night also received a score of 3. In addition, individuals who did not report frequency but indicated they got up to urinate during the night also received a score of 1. The sum of the m-IPSS scores resulted in a range of 0–9 for storage symptoms and 0–12 for voiding symptoms. The cut-off values for m-IPSS storage and voiding symptoms were: 0–5 (low symptom score) and  $\geq 6$  (high symptom score).

**Table 1.** Prevalence of severe Lower Urinary Tract Symptoms LUTS (m-IPSS  $\geq 12$ ) according to doctor-diagnosed prostate health factors in the 45 and Up Study.

|                              | Proportion with severe LUTS overall (m-IPSS $\geq 12$ ) |                   |                     |                   |                   |                      |
|------------------------------|---------------------------------------------------------|-------------------|---------------------|-------------------|-------------------|----------------------|
|                              | % (n with severe LUTS/total)                            |                   |                     |                   |                   |                      |
|                              | Age 45–49                                               | Age 50–59         | Age 60–69           | Age 70–79         | Age $\geq 80$     | Total**              |
| <b>Prostate cancer</b>       |                                                         |                   |                     |                   |                   |                      |
| Yes                          | 12.5% (4/32)                                            | 6.9% (39/567)     | 6.9% (130/1,880)    | 7.2% (156/2,178)  | 9.4% (136/1,455)  | 7.6% (465/6,112)     |
| No                           | 1.1% (135/12,831)                                       | 2.1% (729/34,389) | 4.0% (1,160/29,349) | 5.1% (794/15,558) | 6.1% (496/8,196)  | 3.3% (3,314/100,323) |
| <b>Total prostatectomy</b>   |                                                         |                   |                     |                   |                   |                      |
| Yes                          | 6.9% (2/29)                                             | 5.0% (21/422)     | 3.6% (44/1,234)     | 4.7% (53/1,121)   | 7.6% (53/698)     | 4.9% (173/3,504)     |
| No                           | 1.1% (137/12,834)                                       | 2.2% (747/34,534) | 4.2% (1,246/29,995) | 5.4% (897/16,615) | 6.5% (579/8,953)  | 3.5% (3,606/102,931) |
| <b>Partial prostatectomy</b> |                                                         |                   |                     |                   |                   |                      |
| Yes                          | 9.7% (3/31)                                             | 8.8% (26/294)     | 8.8% (115/1,311)    | 7.3% (154/2,103)  | 8.5% (157/1,843)  | 8.2% (455/5,582)     |
| No                           | 1.1% (136/12,832)                                       | 2.1% (742/34,662) | 3.9% (1,175/29,918) | 5.1% (796/15,633) | 6.1% (475/7,808)  | 3.3% (3,324/100,853) |
| <b>Enlarged prostate*</b>    |                                                         |                   |                     |                   |                   |                      |
| Yes                          | 13.7% (39/285)                                          | 13.9% (268/1,925) | 14.8% (546/3,697)   | 14.0% (358/2,552) | 14.4% (204/1,421) | 14.3% (1,415/9,880)  |
| No                           | 0.8% (94/12,513)                                        | 1.4% (437/32,177) | 2.1% (517/24,428)   | 2.7% (304/11,084) | 3.4% (170/5,007)  | 1.8% (1,522/85,209)  |
| <b>Ever had a PSA test*</b>  |                                                         |                   |                     |                   |                   |                      |
| Yes                          | 1.9% (96/5,128)                                         | 2.5% (550/22,213) | 4.1% (904/22,172)   | 5.3% (561/10,594) | 6.7% (284/4,247)  | 3.7% (2,395/64,354)  |
| No                           | 0.5% (37/7,460)                                         | 1.2% (139/11,264) | 2.4% (129/5,357)    | 3.2% (85/2,645)   | 3.9% (73/1,890)   | 1.6% (463/28,616)    |

\*Excluding men with prostate cancer and/or previous prostate surgery.

\*\*Total numbers in Table 1 do not include missing cases. Percentage missing: Ever had a PSA test 2.2%; other variables = 0 missing.

doi:10.1371/journal.pone.0109278.t001

### Demographic, lifestyle, and health-related variables

Demographic and lifestyle variables investigated included age, education, net annual household income from all sources, health insurance status, alcohol consumption, smoking, physical activity (measured by the Active Australia Survey [18]) and body mass index (BMI [19]). Health-related issues were determined using the question: ‘Has a doctor ever told you that you have...’ ‘prostate cancer’, ‘an enlarged prostate’, ‘heart disease’, ‘stroke’, ‘diabetes’, ‘high blood pressure’ or ‘blood clot (thrombosis).’ Individuals were also asked ‘have you ever had any of the following operations?’ ‘vasectomy’, ‘part of prostate removed’, or ‘whole prostate removed’ and whether they had ever had a prostate specific antigen (PSA) test. Erectile dysfunction was classified based on participants’ answer to the question ‘how often are you able to get and keep an erection that is firm enough for satisfactory sexual activity?’ Male infertility was determined by the question, ‘have

you ever tried for more than 1 year but have been unable to father children?’ Physical functional limitation was assessed by the Medical Outcomes Study – Physical Functioning scale (MOS-PF) [20]. Participants were also asked ‘do you regularly need help with daily tasks because of long-term illness or disability?’ Self-rated quality of life health was measured using a five-point Likert scale with response categories of ‘excellent’, ‘very good’, ‘good’, ‘fair’ or ‘poor’. Psychological distress was measured using the Kessler Psychological Distress Scale (K10) [21].

### Statistical analysis

We first calculated the prevalence of severe overall LUTS (m-IPSS  $\geq 12$ ) by factors related to prostate disease by 10-year age groups. Among men without a history of prostate cancer, prostatectomy or part of their prostate removed, we also calculated

**Table 2.** Overall Lower Urinary Tract Symptoms (LUTS) prevalence by age in the 45 and Up Study based on the modified IPSS.\*

| LUTS                   | Age in years   |                |                |               |               |                |
|------------------------|----------------|----------------|----------------|---------------|---------------|----------------|
|                        | % (n)          |                |                |               |               |                |
|                        | 45–49          | 50–59          | 60–69          | 70–79         | $\geq 80$     | Total          |
| <b>No/Mild (0–5)</b>   | 89.4% (11,440) | 84.8% (28,928) | 76.6% (21,548) | 70.2% (9,567) | 64.6% (4,151) | 79.5% (75,634) |
| <b>Moderate (6–11)</b> | 9.6% (1,225)   | 13.1% (4,469)  | 19.6% (5,514)  | 25.0% (3,407) | 29.6% (1,903) | 17.4% (16,518) |
| <b>Severe (12–21)</b>  | 1.0% (133)     | 2.1% (705)     | 3.8% (1,063)   | 4.9% (662)    | 5.8% (374)    | 3.1% (2,937)   |
| <b>Mean score [SD]</b> | 2.58 [2.44]    | 3.04 [2.86]    | 3.83 [3.31]    | 4.41 [3.49]   | 4.85 [3.66]   | 3.53 [3.18]    |
| <b>Total n</b>         | 12,798         | 34,102         | 28,125         | 13,636        | 6,428         | 95,089         |

\*Excluding men with prostate cancer and/or previous prostate surgery.

doi:10.1371/journal.pone.0109278.t002

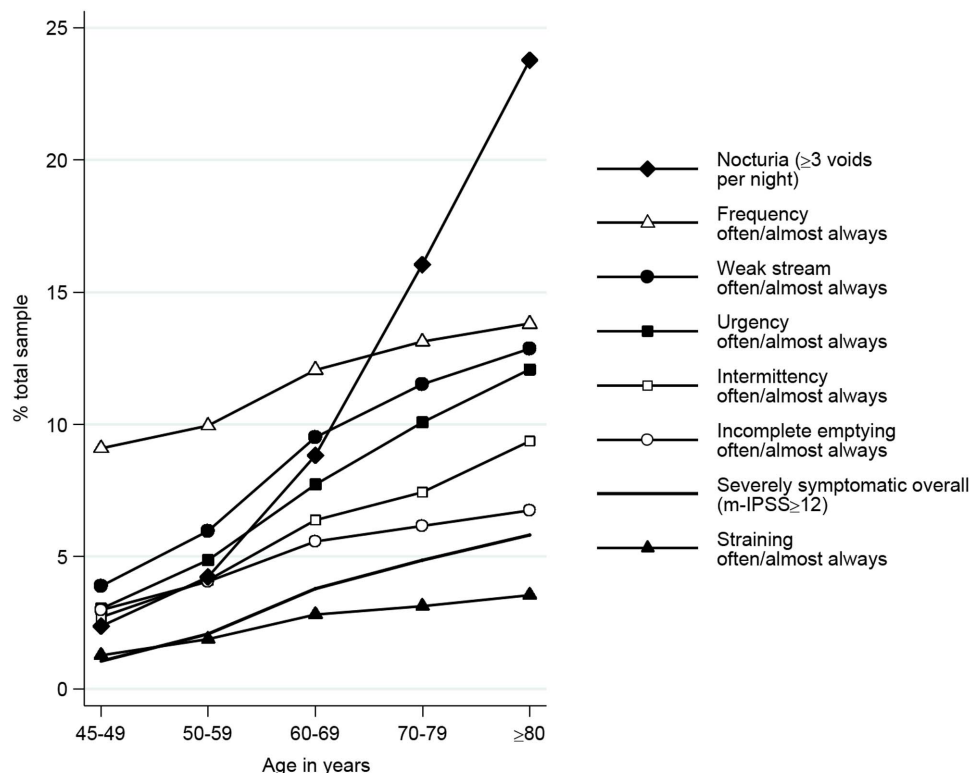

**Figure 1. Prevalence of Lower Urinary Tract Symptoms (LUTS) by age group among men aged 45 and over.\*** Figure 1 displays the prevalence of each Lower Urinary Tract Symptom (LUTS) as it increased with each increase in age group (Fig 1). We excluded all men with prostate cancer or previous prostate surgery from this figure to demonstrate the effect of ageing on LUTS. Most notably nocturia (needing to void 3 or more times per night) increased from 2% in men aged 45–49 to 24% in men aged 80 years and over. \*Excluding men with prostate cancer or previous prostate surgery.

doi:10.1371/journal.pone.0109278.g001

the proportion of men with severe LUTS by whether they had an enlarged prostate and a history of PSA testing.

For subsequent analyses we excluded men who reported ever having prostate cancer, a prostatectomy or part of their prostate removed because these factors are known to affect LUTS. We calculated the proportion of men with severe LUTS by demographic, lifestyle and health-related factors. We estimated the strength of association between these factors and severe LUTS, using logistic regression to calculate odds ratios (OR) and 95% confidence intervals (CI), first adjusting for age only, then also adjusting for education, income, alcohol consumption, smoking, BMI and physical activity. Variables used for ORs and confidence intervals included separate categories for missing values to prevent any loss of observations. ORs and confidence intervals did not change materially when the same models did not include the missing cases (results not shown). Adjusted ORs for each risk factor were also estimated for high storage symptom scores and high voiding symptom scores, separately.

Sensitivity analyses were undertaken using a different cut-point for severe LUTS in order to investigate the effect of an alternate grouping of symptoms on results. For this, we repeated the analyses for severe LUTS, classifying individuals with a m-IPSS score of  $\geq 11$  as severely symptomatic as opposed to a score of  $\geq 12$ . Sensitivity analysis showed little material difference in results.

All analyses were conducted with Stata Version 12.0.

## Ethics statement

The study was approved by the University of New South Wales Human Research Ethics Committee Application (HREC Application number 05035). All respondents provided informed written consent.

## Results

Overall, 18.3% of the 106,435 men in the cohort reported symptoms consistent with moderate, and 3.6% severe, overall LUTS. Severe LUTS were more common among men reporting previous prostate cancer (7.6%), total prostatectomy (4.9%) or removal of part of the prostate (8.2%) compared with other men (**Table 1**). Prevalence of severe LUTS was even higher among men without a history of prostate cancer or prostatectomy who reported a previous doctor-diagnosis of an enlarged prostate (14.3%). Of the 95,089 men with no history of prostate cancer or prostatectomy, 79.5% had either no or mild LUTS, 17.4% had moderate LUTS and 3.1% had severe LUTS (**Table 2**). The proportion with moderate-severe LUTS increased with age, from 10.6% among men aged 45–49 to 35.4% for men aged  $\geq 80$ .

The prevalence of severe overall, storage and voiding symptoms all increased with age, with a marked increase in high storage symptom scores from the age of 70 (Figures 1 and 2). Nocturia was the most common symptom reported, with almost a quarter of men  $\geq 80$  years reporting  $\geq 3$  voids/night. Of the 2,937 men with severe overall LUTS, 2,653 (90%) had high voiding symptom scores; 2,222 (76%) had high storage symptom scores; and 1,938 (66%) had both high voiding and high storage symptom scores.

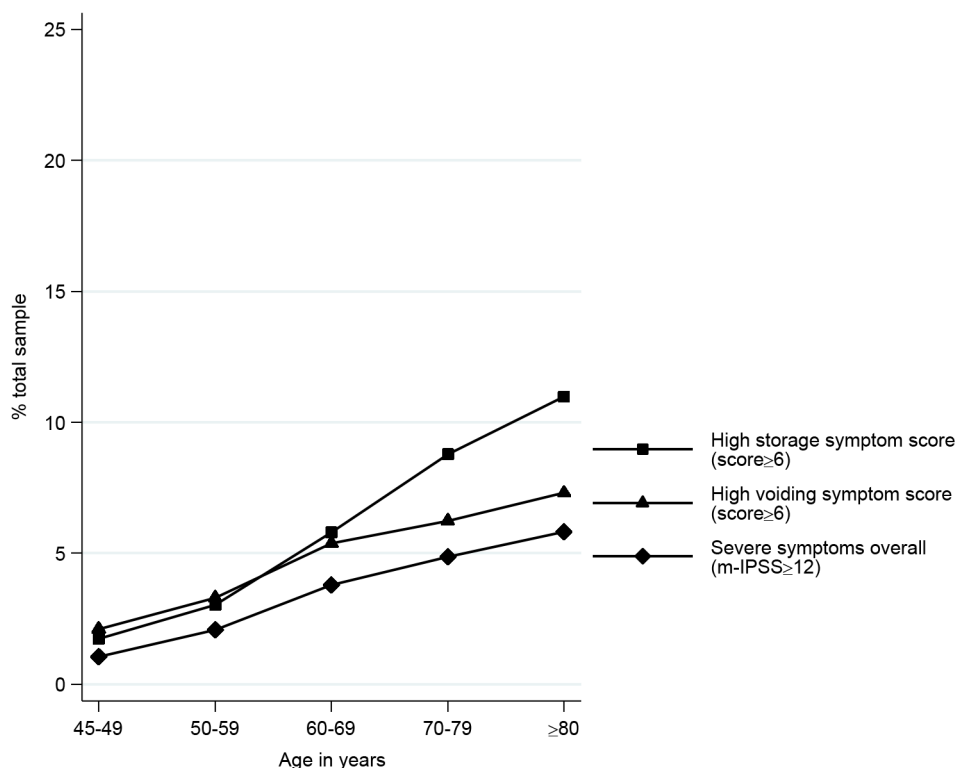

**Figure 2. Proportion of men aged 45 and over with severe overall LUTS and high storage and voiding symptom scores, by age.\***

Figure 2 displays the prevalence of high storage symptom scores (scoring 6 or more on the modified International Prostate Symptom Score (m-IPSS)), high voiding symptom scores (m-IPSS of 6 or more), and high overall LUTS scores (m-IPSS of 12 or more) as it increased with each increase in age group (Fig 2). We excluded all men with prostate cancer or previous prostate surgery from this figure to demonstrate the effect of ageing on LUTS. High storage problems were more common than voiding symptoms at or above 60 years old. \*Excluding men with prostate cancer or previous prostate surgery.

doi:10.1371/journal.pone.0109278.g002

After adjustment for demographic and lifestyle factors, the odds of severe overall, storage and voiding symptoms increased with age; the odds of severe overall LUTS were more than 4-fold higher among men aged  $\geq 85$  than those aged 45–49 (Table 3). The adjusted OR for severe overall, storage and voiding symptoms were lower for men with higher educational attainment, higher income and with private health insurance.

Men who reported higher versus lower levels of physical activity had lower odds of severe LUTS. Both current and past smokers had higher odds of severe LUTS than never smokers, and obese men were more likely to report severe LUTS than those with a normal BMI of 18.5–24.9 kg/m<sup>2</sup>. A similar pattern of ORs was evident for both high storage and voiding symptom sub-types (Table 3).

Men who reported ever being told by their doctor that they had heart disease, stroke, diabetes, high blood pressure or any cardiovascular disease were more likely to have severe LUTS than men without these conditions, with ORs all at or in excess of 1.20 (Table 4). ORs for both high voiding and storage symptom scores were also raised in men with these conditions. The odds for severe LUTS were almost four times higher in men with severe versus no erectile dysfunction. Odds of severe LUTS were also higher in men who reported difficulty fathering children, but there was no association between vasectomy and severe LUTS, with an upper confidence limit of 1.14. Men who required help with daily tasks had almost three times the odds of severe LUTS than men who did not, and there was a marked increase in severe LUTS with increasing physical functional limitation, increasing psycho-

logical distress and, decreasing quality of life, with a more than 8-fold increase in the odds of LUTS in those reporting poor versus excellent quality of life.

## Discussion

This large, population-based study of older Australian men adds to the growing body of evidence that while LUTS increase with age, a number of potentially modifiable risk factors including smoking, low physical activity and obesity are associated with severe LUTS. General ill-health and a range of comorbid conditions, some of which share these modifiable risk factors, were also associated with severe LUTS. The strong relationship observed between LUTS and physical functional limitation and general disability in men, regardless of its cause, has not, to our knowledge, been shown before. Consistent with previous research, we also found that nocturia was the most commonly reported symptom overall and that high storage symptom scores increased more with age than voiding symptoms [9]. This is one of the first studies with an adequate sample size to quantify risk factor associations with severe LUTS and to show relationships with age and in different sub-populations. It is also the largest population-based study of LUTS.

In the entire cohort severe LUTS were reported by 3% of men aged  $\geq 45$  years without previous prostate cancer and/or surgery, which is consistent with other studies [6,14]. LUTS were particularly common in men reporting a previous diagnosis of an enlarged prostate (without previous prostate cancer or surgery),

**Table 3.** Relationship of overall, storage and voiding severe Lower Urinary Tract Symptoms (LUTS) to demographic factors and health behaviours among men in the 45 and Up Study.\*

| Characteristic                                    | Total** | Severe symptoms overall (m-IPSS $\geq 12$ ) |                       |                     | High storage symptom score (score $\geq 6$ ) | High voiding symptom score (score $\geq 6$ ) |
|---------------------------------------------------|---------|---------------------------------------------|-----------------------|---------------------|----------------------------------------------|----------------------------------------------|
|                                                   |         | % (n)                                       | OR                    | OR (95%CI)***       | OR (95%CI)***                                | OR (95%CI)***                                |
|                                                   |         |                                             | adjusted for age only | full adjusted model |                                              |                                              |
| <b>Age in years</b>                               |         |                                             |                       |                     |                                              |                                              |
| 45–49                                             | 12,798  | 1.0% (133)                                  | 1.00                  | 1.00                | 1.00                                         | 1.00                                         |
| 50–54                                             | 16,348  | 1.7% (272)                                  | 1.61                  | 1.54 (1.25–1.91)    | 1.42 (1.20–1.67)                             | 1.24 (1.06–1.45)                             |
| 55–59                                             | 17,754  | 2.4% (433)                                  | 2.38                  | 2.22 (1.83–2.72)    | 1.95 (1.66–2.28)                             | 1.84 (1.60–2.13)                             |
| 60–64                                             | 15,611  | 3.4% (533)                                  | 3.37                  | 2.87 (2.36–3.50)    | 2.79 (2.39–3.25)                             | 2.28 (1.97–2.63)                             |
| 65–69                                             | 12,514  | 4.2% (530)                                  | 4.21                  | 3.24 (2.66–3.96)    | 3.20 (2.73–3.74)                             | 2.45 (2.11–2.84)                             |
| 70–74                                             | 8,175   | 4.8% (390)                                  | 4.77                  | 3.54 (2.88–4.36)    | 4.08 (3.47–4.80)                             | 2.61 (2.23–3.06)                             |
| 75–79                                             | 5,461   | 5.0% (272)                                  | 4.99                  | 3.56 (2.85–4.44)    | 4.69 (3.96–5.56)                             | 2.45 (2.06–2.92)                             |
| 80–84                                             | 4,896   | 5.6% (272)                                  | 5.60                  | 3.92 (3.14–4.90)    | 5.17 (4.36–6.14)                             | 2.75 (2.32–3.28)                             |
| $\geq 85$                                         | 1,532   | 6.7% (102)                                  | 6.79                  | 4.76 (3.61–6.28)    | 6.51 (5.26–8.04)                             | 3.17 (2.51–3.99)                             |
| <b>Education attainment</b>                       |         |                                             |                       |                     |                                              |                                              |
| No school certificate                             | 9,063   | 5.6% (509)                                  | 1.00                  | 1.00                | 1.00                                         | 1.00                                         |
| School certificate                                | 13,829  | 3.5% (478)                                  | 0.64                  | 0.72 (0.63–0.82)    | 0.79 (0.71–0.89)                             | 0.81 (0.72–0.91)                             |
| Higher school certificate/trade                   | 26,886  | 3.2% (853)                                  | 0.64                  | 0.75 (0.66–0.84)    | 0.82 (0.75–0.90)                             | 0.83 (0.75–0.92)                             |
| Certificate/diploma                               | 18,620  | 2.5% (468)                                  | 0.52                  | 0.66 (0.58–0.76)    | 0.76 (0.68–0.85)                             | 0.76 (0.68–0.85)                             |
| Tertiary qualification                            | 25,432  | 2.3% (583)                                  | 0.51                  | 0.78 (0.68–0.89)    | 0.87 (0.78–0.97)                             | 0.87 (0.77–0.97)                             |
| <b>Annual household income</b>                    |         |                                             |                       |                     |                                              |                                              |
| <\$20,000                                         | 15,129  | 6.0% (901)                                  | 1.00                  | 1.00                | 1.00                                         | 1.00                                         |
| \$20,000–\$39,999                                 | 16,188  | 3.7% (601)                                  | 0.64                  | 0.72 (0.65–0.81)    | 0.82 (0.76–0.90)                             | 0.81 (0.74–0.90)                             |
| \$40,000–\$69,999                                 | 19,434  | 2.5% (493)                                  | 0.52                  | 0.62 (0.55–0.70)    | 0.68 (0.62–0.75)                             | 0.72 (0.65–0.80)                             |
| $\geq$ \$70,000                                   | 30,224  | 1.5% (447)                                  | 0.35                  | 0.44 (0.39–0.51)    | 0.52 (0.47–0.58)                             | 0.61 (0.55–0.69)                             |
| <b>Private health insurance</b>                   |         |                                             |                       |                     |                                              |                                              |
| No                                                | 31,280  | 4.3% (1,347)                                | 1.00                  | 1.00                | 1.00                                         | 1.00                                         |
| Yes (Hospital/DVA)                                | 63,809  | 2.5% (1,590)                                | 0.60                  | 0.82 (0.75–0.89)    | 0.85 (0.79–0.91)                             | 0.87 (0.81–0.93)                             |
| <b>Alcoholic drinks per week</b>                  |         |                                             |                       |                     |                                              |                                              |
| 0 drink                                           | 20,770  | 4.3% (895)                                  | 1.33                  | 1.20 (1.08–1.33)    | 1.27 (1.17–1.38)                             | 1.15 (1.06–1.25)                             |
| >0 to <7 drinks                                   | 25,609  | 3.0% (770)                                  | 1.00                  | 1.00                | 1.00                                         | 1.00                                         |
| 7 to <15 drinks                                   | 23,968  | 2.6% (619)                                  | 0.80                  | 0.83 (0.75–0.93)    | 0.92 (0.85–1.01)                             | 0.86 (0.78–0.94)                             |
| $\geq 15$ drinks                                  | 22,583  | 2.6% (602)                                  | 0.84                  | 0.79 (0.71–0.88)    | 0.97 (0.88–1.06)                             | 0.77 (0.70–0.84)                             |
| <b>Tobacco smoking</b>                            |         |                                             |                       |                     |                                              |                                              |
| Never                                             | 45,717  | 2.5% (1,123)                                | 1.00                  | 1.00                | 1.00                                         | 1.00                                         |
| Past                                              | 41,216  | 3.6% (1,490)                                | 1.30                  | 1.31 (1.21–1.43)    | 1.14(1.07–1.22)                              | 1.30 (1.22–1.40)                             |
| Current                                           | 7,853   | 3.9% (306)                                  | 1.88                  | 1.64 (1.43–1.88)    | 1.42 (1.26–1.59)                             | 1.46 (1.30–1.64)                             |
| <b>Body mass index</b>                            |         |                                             |                       |                     |                                              |                                              |
| Underweight<br>(15 to <18.5 kg/m <sup>2</sup> )   | 529     | 5.3% (28)                                   | 1.65                  | 1.36 (0.92–2.01)    | 1.27 (0.92–1.76)                             | 1.16 (0.80–1.67)                             |
| Normal weight<br>(18.5 to <25 kg/m <sup>2</sup> ) | 26,510  | 3.0% (794)                                  | 1.00                  | 1.00                | 1.00                                         | 1.00                                         |
| Overweight<br>(25 to <30 kg/m <sup>2</sup> )      | 42,512  | 2.8% (1,198)                                | 1.01                  | 1.02 (0.93–1.12)    | 0.99 (0.92–1.06)                             | 1.04 (0.96–1.12)                             |
| Obese<br>(30 to 50 kg/m <sup>2</sup> )            | 19,935  | 3.7% (727)                                  | 1.40                  | 1.27 (1.14–1.41)    | 1.41 (1.30–1.54)                             | 1.14 (1.04–1.25)                             |
| <b>Sessions of physical activity per week</b>     |         |                                             |                       |                     |                                              |                                              |
| First tertile (Low)                               | 27,959  | 3.6% (1,017)                                | 1.00                  | 1.00                | 1.00                                         | 1.00                                         |
| Second tertile                                    | 32,880  | 2.9% (955)                                  | 0.78                  | 0.85 (0.77–0.93)    | 0.89 (0.83–0.96)                             | 0.80 (0.74–0.86)                             |

**Table 3.** Cont.

| Characteristic       | Total** | Severe symptoms overall (m-IPSS $\geq$ 12) |                       |                     | High storage symptom score (score $\geq$ 6) | High voiding symptom score (score $\geq$ 6) |
|----------------------|---------|--------------------------------------------|-----------------------|---------------------|---------------------------------------------|---------------------------------------------|
|                      |         | % (n)                                      | OR                    | OR (95%CI)***       | OR (95%CI)***                               | OR (95%CI)***                               |
|                      |         |                                            | adjusted for age only | full adjusted model |                                             |                                             |
| Third tertile (High) | 32,248  | 2.8% (893)                                 | 0.76                  | 0.83 (0.76–0.91)    | 0.88 (0.81–0.95)                            | 0.77 (0.71–0.83)                            |

\*Excluding men with prostate cancer and/or previous prostate surgery.

\*\*Total numbers in Table 3 do not include missing cases, but odds ratios and confidence intervals include the missing cases. Percentage missing: Education attainment = 1.3%; Annual household income = 14.8%; Alcoholic drinks per week = 1.2%; Tobacco smoking = 0.3%; Body mass index = 5.9%; Sessions of physical activity per week = 2.1%; other variables = 0 missing.

\*\*\*Adjusted for age, education, income, alcohol consumption, smoking, BMI and physical activity.

doi:10.1371/journal.pone.0109278.t003

and men who had prostate cancer and/or a total or partial prostatectomy. These findings are consistent with various studies reporting quality of life outcomes in men post-prostatectomy, which show higher odds of urinary leakage among men who have surgery compared to no treatment or age-matched controls, but lower odds of weak stream or nocturia [22].

Evidence for a relationship between smoking and LUTS in previous studies has been mixed [6,10,23,24,25]. In our study, the odds of severe LUTS were 64% higher for current smokers and 31% higher for past smokers compared to never smokers. Alcohol consumption was associated with lower risks of both severe overall LUTS and voiding LUTS in our cohort, in contrast with a meta-analysis that found increased LUTS (but not BPH) with alcohol consumption [26].

Previous reports of increased LUTS with increasing body-mass-index [27] are consistent with our findings suggesting a stronger relationship with storage than with voiding symptoms. Increased levels of physical activity have consistently been associated with lower levels of LUTS [28,29]. We also found an inverse relationship between physical activity and severe LUTS.

All of the comorbid conditions measured; heart disease, stroke, diabetes, high blood pressure and cardiovascular disease, were associated with higher odds of severe LUTS, even after adjusting for lifestyle risk factors. The mechanism for this is unclear however medications for these conditions may increase LUTS. We found an association between erectile dysfunction and severe LUTS, consistent with the evidence that several common pathophysiological mechanisms, risk factors and comorbidities are shared between both conditions [30]. These shared risk factors include diabetes, lipid disorders, metabolic syndrome and major cardiac diseases. Early diagnosis of either LUTS or erectile dysfunction provides an opportunity for clinicians to address and potentially modify risk factors that may reduce the risk of subsequent cardiovascular disease. Our finding of an increased risk of severe LUTS among men reporting difficulty fathering children has not, to our knowledge, been observed before and requires further exploration.

A major finding of the study is the strong and graded relationship of severe LUTS, and storage and voiding symptoms, to physical functional impairment and to general disability. The aetiology underlying these observations is not known, however it is likely to be in part related to the way in which morbidity influences LUTS. Furthermore, the strong relationship of disability to LUTS is likely to influence its relation to quality of life and psychological distress [31]. Nearly all LUTS are associated with some form of reduced quality of life or increased levels of anxiety and depression, with men who experience severe symptoms or multiple symptoms reporting the most impact on quality of life and mental

health [1,2,32,33,34]; this is likely to reflect both the direct impact of LUTS and confounding due to disability and other health issues. Given the relationship of symptoms to quality of life, it is concerning that only a small proportion of men seek medical treatment for LUTS [35]. Reasons for this include a reluctance to discuss symptoms with a doctor, and the belief that LUTS are an inevitable part of ageing or are untreatable [35]. It is important that more is known about the aetiology of LUTS so that treatment and prevention can be optimised.

This study has a number of strengths, including a large sample size, sampling from the general population, use of a measure of LUTS that has been calibrated against the accepted international standard and the ascertainment of a large number of health-related factors using validated measures.

There are however limitations to the study. 1) Estimates of point prevalence in the 45 and Up Study should be interpreted with caution, given the low participation rate. However, the 21.9% prevalence of moderate-severe LUTS reported among the entire sample is very similar to previous Australian and international studies [5,6,7]. Moreover, empirical work from the 45 and Up Study shows that the effect size estimates from the Study are comparable to those from more representative studies and are generally not affected by response rates [16]. 2) Men with a prior history of prostate cancer or prostatectomy were excluded from the main analyses of this study. Therefore, our results represent the relationship of LUTS to lifestyle and health-related factors at a specific time point among men who have not had previous surgery and as a result may underestimate the burden of disease from severe LUTS in the population. 3) We lacked information on use of medications to treat LUTS, however this bias would tend to lead to conservative estimates of associations because users may have been misclassified as having lesser LUTS. 4) A cross-sectional analysis is unable to identify causal relationships and as such there is the possibility of reverse causality in a number of the associations described. For example, the direction of the relationship between LUTS and alcohol and LUTS and physical activity cannot be determined from these data.

Overall, the findings suggest that maintaining a healthy lifestyle is likely to relate to a lower risk of LUTS, even at older ages.

## Summary

As well as demonstrating strong relationships between disability and LUTS, this report confirms and quantifies a number of important risk factors for LUTS in men. In addition to low socioeconomic status and serious chronic disease, it identifies several modifiable risk factors that are associated with severe

**Table 4.** Risk of severe overall, storage and voiding Lower Urinary Tract Symptoms (LUTS) according to self-reported health measures among men in the 45 and Up Study.\*

| Characteristic                            | Total** | Severe symptoms overall (m-IPSS $\geq 12$ ) |                       |                     | High storage symptom score (score $\geq 6$ ) | High voiding symptom score (score $\geq 6$ ) |
|-------------------------------------------|---------|---------------------------------------------|-----------------------|---------------------|----------------------------------------------|----------------------------------------------|
|                                           |         | % (n)                                       | OR                    | OR (95%CI)***       | OR (95%CI)***                                | OR (95%CI)***                                |
|                                           |         |                                             | adjusted for age only | full adjusted model |                                              |                                              |
| <b>Heart disease</b>                      |         |                                             |                       |                     |                                              |                                              |
| No                                        | 81,658  | 2.7% (2,234)                                | 1.00                  | 1.00                | 1.00                                         | 1.00                                         |
| Yes                                       | 13,431  | 5.2% (703)                                  | 1.46                  | 1.36 (1.24–1.49)    | 1.39 (1.30–1.50)                             | 1.29 (1.20–1.40)                             |
| <b>Stroke</b>                             |         |                                             |                       |                     |                                              |                                              |
| No                                        | 92,231  | 3.0% (2,740)                                | 1.00                  | 1.00                | 1.00                                         | 1.00                                         |
| Yes                                       | 2,858   | 6.9% (197)                                  | 1.75                  | 1.51 (1.29–1.76)    | 1.56 (1.38–1.77)                             | 1.35 (1.17–1.56)                             |
| <b>Diabetes</b>                           |         |                                             |                       |                     |                                              |                                              |
| No                                        | 85,510  | 2.8% (2,427)                                | 1.00                  | 1.00                | 1.00                                         | 1.00                                         |
| Yes                                       | 9,579   | 5.3% (510)                                  | 1.60                  | 1.31 (1.18–1.46)    | 1.37 (1.26–1.49)                             | 1.24 (1.13–1.36)                             |
| <b>High blood pressure</b>                |         |                                             |                       |                     |                                              |                                              |
| No                                        | 60,644  | 2.6% (1,596)                                | 1.00                  | 1.00                | 1.00                                         | 1.00                                         |
| Yes                                       | 34,445  | 3.9% (1,341)                                | 1.26                  | 1.20 (1.11–1.29)    | 1.28 (1.20–1.36)                             | 1.14 (1.06–1.21)                             |
| <b>Any cardiovascular disease****</b>     |         |                                             |                       |                     |                                              |                                              |
| No                                        | 77,928  | 2.6% (2,030)                                | 1.00                  | 1.00                | 1.00                                         | 1.00                                         |
| Yes                                       | 17,161  | 5.3% (907)                                  | 1.56                  | 1.43 (1.32–1.56)    | 1.45 (1.36–1.56)                             | 1.34 (1.24–1.44)                             |
| <b>Vasectomy</b>                          |         |                                             |                       |                     |                                              |                                              |
| No                                        | 70,023  | 3.3% (2,285)                                | 1.00                  | 1.00                | 1.00                                         | 1.00                                         |
| Yes                                       | 25,066  | 2.6% (652)                                  | 0.96                  | 1.04 (0.95–1.14)    | 0.99 (0.91–1.06)                             | 1.05 (0.97–1.13)                             |
| <b>Erectile dysfunction</b>               |         |                                             |                       |                     |                                              |                                              |
| none                                      | 36,266  | 1.3% (471)                                  | 1.00                  | 1.00                | 1.00                                         | 1.00                                         |
| mild                                      | 22,118  | 2.3% (514)                                  | 1.60                  | 1.52 (1.35–1.73)    | 1.47 (1.33–1.63)                             | 1.48 (1.34–1.63)                             |
| moderate                                  | 14,878  | 4.6% (684)                                  | 2.95                  | 2.53 (2.23–2.87)    | 2.35 (2.12–2.60)                             | 2.24 (2.02–2.48)                             |
| severe                                    | 11,293  | 7.7% (873)                                  | 4.84                  | 3.80 (3.32–4.34)    | 3.23 (2.90–3.59)                             | 3.17 (2.84–3.53)                             |
| <b>Difficulty fathering children</b>      |         |                                             |                       |                     |                                              |                                              |
| No                                        | 84,104  | 3.0% (2,540)                                | 1.00                  | 1.00                | 1.00                                         | 1.00                                         |
| Yes                                       | 6,897   | 3.4% (237)                                  | 1.24                  | 1.26 (1.10–1.45)    | 1.22 (1.09–1.37)                             | 1.31 (1.17–1.47)                             |
| <b>Requires help with daily tasks</b>     |         |                                             |                       |                     |                                              |                                              |
| No                                        | 87,443  | 2.7% (2,316)                                | 1.00                  | 1.00                | 1.00                                         | 1.00                                         |
| Yes                                       | 4,009   | 11.1% (445)                                 | 3.93                  | 2.94 (2.62–3.31)    | 2.61 (2.37–2.89)                             | 2.52 (2.26–2.80)                             |
| <b>Physical functional limitation</b>     |         |                                             |                       |                     |                                              |                                              |
| None                                      | 32,163  | 1.3% (409)                                  | 1.00                  | 1.00                | 1.00                                         | 1.00                                         |
| Minor                                     | 27,927  | 2.0% (571)                                  | 1.40                  | 1.37 (1.21–1.57)    | 1.39 (1.26–1.54)                             | 1.38 (1.25–1.52)                             |
| Moderate                                  | 18,385  | 4.2% (770)                                  | 2.68                  | 2.41 (2.12–2.74)    | 2.45 (2.22–2.71)                             | 2.21 (1.99–2.45)                             |
| Severe limitation                         | 8,499   | 9.6% (815)                                  | 6.42                  | 5.17 (4.51–5.93)    | 4.48 (4.01–5.00)                             | 4.23 (3.78–4.74)                             |
| <b>Psychological distress (K10 score)</b> |         |                                             |                       |                     |                                              |                                              |
| Low (10–15)                               | 70,370  | 2.0% (1,390)                                | 1.00                  | 1.00                | 1.00                                         | 1.00                                         |
| Moderate (16–21)                          | 13,088  | 5.0% (648)                                  | 3.00                  | 2.75 (2.49–3.04)    | 2.42 (2.24–2.62)                             | 2.43 (2.24–2.64)                             |
| High (22–50)                              | 5,990   | 9.2% (553)                                  | 6.22                  | 5.03 (4.50–5.62)    | 4.15 (3.77–4.56)                             | 4.18 (3.79–4.60)                             |
| <b>Self-rated quality of life</b>         |         |                                             |                       |                     |                                              |                                              |
| Excellent                                 | 21,384  | 1.4% (306)                                  | 1.00                  | 1.00                | 1.00                                         | 1.00                                         |
| Very good                                 | 35,611  | 1.9% (684)                                  | 1.31                  | 1.26 (1.10–1.45)    | 1.31 (1.18–1.45)                             | 1.36 (1.22–1.51)                             |
| Good                                      | 25,405  | 3.9% (1,002)                                | 2.61                  | 2.31 (2.02–2.65)    | 2.18 (1.97–2.43)                             | 2.13 (1.92–2.38)                             |



Table 4. Cont.

| Characteristic | Total** | Severe symptoms overall (m-IPSS $\geq 12$ ) |                       |                     | High storage symptom score (score $\geq 6$ ) | High voiding symptom score (score $\geq 6$ ) |
|----------------|---------|---------------------------------------------|-----------------------|---------------------|----------------------------------------------|----------------------------------------------|
|                |         | % (n)                                       | OR                    | OR (95%CI)***       | OR (95%CI)***                                | OR (95%CI)***                                |
|                |         |                                             | adjusted for age only | full adjusted model |                                              |                                              |
| Fair           | 7,465   | 7.8% (582)                                  | 5.31                  | 4.29 (3.68–4.99)    | 3.98 (3.53–4.49)                             | 3.79 (3.34–4.29)                             |
| Poor           | 1,512   | 14.5% (219)                                 | 11.48                 | 8.69 (7.13–10.60)   | 7.04 (5.95–8.34)                             | 6.51 (5.45–7.77)                             |

\*Excluding men with prostate cancer and/or previous prostate surgery.

\*\*Total numbers in Table 4 do not include missing cases, but odds ratios and confidence intervals include the missing cases. Percentage missing: Erectile dysfunction = 11.1%; Difficulty fathering children = 4.3%; Requires help with daily tasks = 3.8%; Physical functional limitation = 8.5%; Psychological distress (K10 score) = 5.9%; Self-rated quality of life = 3.9%; other variables = 0 missing.

\*\*\*Adjusted for age, education, income, alcohol consumption, smoking, BMI and physical activity.

\*\*\*\*Participants were categorised as having cardiovascular disease if they answered YES to any of the following 'Has your doctor ever told you that you have heart disease/stroke/blood clot (thrombosis)?'

doi:10.1371/journal.pone.0109278.t004

LUTS, including smoking, lack of physical activity and obesity. These factors, if modified, may reduce the risk of LUTS, as well as a number of other chronic diseases, in men.

## Acknowledgments

This research was completed using data collected through the 45 and Up Study ([www.saxinstitute.org.au](http://www.saxinstitute.org.au)). The 45 and Up Study is managed by the Sax Institute in collaboration with major partner Cancer Council NSW; and partners: the National Heart Foundation of Australia (NSW Division);

NSW Ministry of Health; beyondblue; Ageing, Disability and Home Care, Department of Family and Community Services; the Australian Red Cross Blood Service; and UnitingCare Ageing. We thank the many thousands of people participating in the 45 and Up Study.

## Author Contributions

Conceived and designed the experiments: DPS EB MFW GT MIP MSC TD. Analyzed the data: DPS IKL MFW EB KS. Wrote the paper: DPS MFW KS RK GT MIP MSC TD IKL EB.

## References

- Girman CJ, Jacobsen SJ, Tsukamoto T, Richard F, Garraway WM, et al. (1998) Health-related quality of life associated with lower urinary tract symptoms in four countries. *Urology* 51: 428–436.
- Coyne KS, Wein AJ, Tubaro A, Sexton CC, Thompson CL, et al. (2009) The burden of lower urinary tract symptoms: evaluating the effect of LUTS on health-related quality of life, anxiety and depression: EpiLUTS. *BJU Int* 103 Suppl 3: 4–11.
- Stroup SP, Palazzi-Churas K, Kopp RP, Parsons JK (2012) Trends in adverse events of benign prostatic hyperplasia (BPH) in the USA, 1998 to 2008. *BJU Int* 109: 84–87.
- Barry MJ, Fowler FJ Jr., O'Leary MP, Bruskewitz RC, Holtgrewe HL, et al. (1992) The American Urological Association symptom index for benign prostatic hyperplasia. The Measurement Committee of the American Urological Association. *J Urol* 148: 1549–1557; discussion 1564.
- Boyle P, Robertson C, Mazzetta C, Keech M, Hobbs FD, et al. (2003) The prevalence of lower urinary tract symptoms in men and women in four centres. The UrEpiK study. *BJU Int* 92: 409–414.
- Holden CA, McLachlan RI, Pitts M, Cumming R, Wittert G, et al. (2010) Determinants of male reproductive health disorders: the Men in Australia Telephone Survey (MATeS). *BMC Public Health* 10: 96.
- Coyne KS, Sexton CC, Thompson CL, Milsom I, Irwin D, et al. (2009) The prevalence of lower urinary tract symptoms (LUTS) in the USA, the UK and Sweden: results from the Epidemiology of LUTS (EpiLUTS) study. *BJU Int*.
- Parsons JK, Messer K, White M, Barrett-Connor E, Bauer DC, et al. (2011) Obesity increases and physical activity decreases lower urinary tract symptom risk in older men: the Osteoporotic Fractures in Men study. *Eur Urol* 60: 1173–1180.
- Irwin DE, Milsom I, Kopp Z, Abrams P, Artibani W, et al. (2009) Prevalence, severity, and symptom bother of lower urinary tract symptoms among men in the EPIC study: impact of overactive bladder. *Eur Urol* 56: 14–20.
- Coyne KS, Kaplan SA, Chapple CR, Sexton CC, Kopp ZS, et al. (2009) Risk factors and comorbid conditions associated with lower urinary tract symptoms: EpiLUTS. *BJU Int* 103 Suppl 3: 24–32.
- Wennberg AL, Altman D, Lundholm C, Klint A, Iliadou A, et al. (2011) Genetic influences are important for most but not all lower urinary tract symptoms: a population-based survey in a cohort of adult Swedish twins. *Eur Urol* 59: 1032–1038.
- Rohrmann S, Smit E, Giovannucci E, Platz EA (2004) Associations of obesity with lower urinary tract symptoms and noncancer prostate surgery in the Third National Health and Nutrition Examination Survey. *Am J Epidemiol* 159: 390–397.
- Suzuki S, Platz EA, Kawachi I, Willett WC, Giovannucci E (2002) Intakes of energy and macronutrients and the risk of benign prostatic hyperplasia. *Am J Clin Nutr* 75: 689–697.
- Latz I, Weber M, Korda R, Smith D, Clements M, et al. (2012) Lower urinary tract symptoms in relation to region of birth in 95,393 men living in Australia: the 45 and Up Study. *World journal of urology*.
- Banks E, Redman S, Jorm L, Armstrong B, Bauman A, et al. (2008) Cohort profile: the 45 and up study. *International Journal of Epidemiology* 37: 941–947.
- Mealing NM, Banks E, Jorm LR, Steel DG, Clements MS, et al. (2010) Investigation of relative risk estimates from studies of the same population with contrasting response rates and designs. *BMC Medical Research Methodology* 10: 26.
- Holden CA, McLachlan RI, Pitts M, Cumming R, Wittert G, et al. (2005) Men in Australia Telephone Survey (MATeS): a national survey of the reproductive health and concerns of middle-aged and older Australian men. *Lancet* 366: 218–224.
- The Australian Institute of Health and Welfare (2003) *The Active Australia Survey: a guide and manual for implementation, analysis and reporting*. Canberra: AIHW.
- World Cancer Reserch Fund/American Institute for Cancer Research (2007) *Food, Nutrition, Physical Activity, and the Prevention of Cancer: a Global Perspective*. Washington, DC: AICR.
- Hays RD, Liu H, Spritzer K, Cella D (2007) Item response theory analyses of physical functioning items in the medical outcomes study. *Medical care* 45: S32–38.
- Kessler RC, Andrews G, Colpe IJ, Hiripi E, Mroczek DK, et al. (2002) Short screening scales to monitor population prevalences and trends in non-specific psychological distress. *Psychological Medicine* 32: 959–976.
- Smith DP, King MT, Egger S, Berry MP, Stricker PD, et al. (2009) Quality of life three years after diagnosis of localised prostate cancer: population based cohort study. *British Medical Journal* 339.
- Seim A, Hoyo C, Ostbye T, Vatten L (2005) The prevalence and correlates of urinary tract symptoms in Norwegian men: the HUNT study. *BJU Int* 96: 88–92.
- Platz EA, Rimm EB, Kawachi I, Colditz GA, Stampfer MJ, et al. (1999) Alcohol consumption, cigarette smoking, and risk of benign prostatic hyperplasia. *Am J Epidemiol* 149: 106–115.
- Maserejian NN, Kupelian V, Miyasato G, McVary KT, McKinlay JB (2012) Are physical activity, smoking and alcohol consumption associated with lower urinary tract symptoms in men or women? Results from a population based observational study. *J Urol* 188: 490–495.

26. Parsons JK, Im R (2009) Alcohol consumption is associated with a decreased risk of benign prostatic hyperplasia. *J Urol* 182: 1463–1468.
27. Mondul AM, Giovannucci E, Platz EA (2014) A prospective study of obesity, and the incidence and progression of lower urinary tract symptoms. *J Urol* 191: 715–721.
28. Parsons JK, Kashfi C (2008) Physical activity, benign prostatic hyperplasia, and lower urinary tract symptoms. *Eur Urol* 53: 1228–1235.
29. Parsons JK, Sarma AV, McVary K, Wei JT (2009) Obesity and benign prostatic hyperplasia: clinical connections, emerging etiological paradigms and future directions. *J Urol* 182: S27–31.
30. Kirby M, Chapple C, Jackson G, Eardley I, Edwards D, et al. (2013) Erectile dysfunction and lower urinary tract symptoms: a consensus on the importance of co-diagnosis. *Int J Clin Pract* 67: 606–618.
31. Banks E, Byles JE, Gibson RE, Rodgers B, Latz IK, et al. (2010) Is psychological distress in people living with cancer related to the fact of diagnosis, current treatment or level of disability? Findings from a large Australian study. *MJA* 193: S62–67.
32. Atlantis E, Lange K, Goldney RD, Martin S, Haren MT, et al. (2011) Specific medical conditions associated with clinically significant depressive symptoms in men. *Soc Psychiatry Psychiatr Epidemiol* 46: 1303–1312.
33. Perchon LF, Pintarelli VL, Bezerra E, Thiel M, Dambros M (2011) Quality of life in elderly men with aging symptoms and lower urinary tract symptoms (LUTS). *Neurourol Urodyn* 30: 515–519.
34. Malmsten UG, Molander U, Peeker R, Irwin DE, Milsom I (2010) Urinary incontinence, overactive bladder, and other lower urinary tract symptoms: a longitudinal population-based survey in men aged 45–103 years. *Eur Urol* 58: 149–156.
35. Sexton CC, Coyne KS, Kopp ZS, Irwin DE, Milsom I, et al. (2009) The overlap of storage, voiding and postmicturition symptoms and implications for treatment seeking in the USA, UK and Sweden: *EpiLUTS*. *BJU Int* 103 Suppl 3: 12–23.
